# Supplementary material for: Cigarette filters as a main microfibers source in aquatic environments: Phase I
Source: Research Square preprint supplement (doi:10.21203/rs.3.rs-6860318/v1), 2025-06-30
Supplement: Supplementary file 1 [file 1d9d4df45d8228fcb44668eb.docx]

**Cigarette filters as a main microfibers source in aquatic environments: Phase I**

Azam Mohammadi1, Farkhondeh Bahrani1, Gabriel Enrique De-la-Torre2,3, Reza Saeedi4,5, Gerrit Renner6,7, Torsten C. Schmidt6,7, Sina Dobaradaran1,6,7*

1Systems Environmental Health and Energy Research Center, The Persian Gulf Biomedical Sciences Research Institute, Bushehr University of Medical Sciences, Bushehr, Iran

2Grupo de Investigación de Biodiversidad, Medio Ambiente y Sociedad, Universidad San Ignacio de Loyola, Lima, Peru

3Graduate School of Energy and Environment, Korea University, 145 Anam-ro, Seongbuk-gu, Seoul 02481, Republic of Korea

4Workplace Health Promotion Research Center, Shahid Beheshti University of Medical Sciences, Tehran, Iran

5Department of Health, Safety and Environment, School of Public Health and Safety, Shahid Beheshti University of Medical Sciences, Tehran, Iran

6Instrumental Analytical Chemistry and Centre for Water and Environmental Research (ZWU), Faculty of Chemistry, University of Duisburg-Essen, Universitätsstr. 5, Essen, 45141, Germany

7Department of Environmental Health Engineering, Faculty of Health and Nutrition, Bushehr University of Medical Sciences, Bushehr, Iran

*Systems Environmental Health and Energy Research Center, Bushehr University of Medical Sciences, Bushehr, Iran. E-mail addresses: Sinadobaradaran@gmail.com, s. dobaradaran@bpums.ac.ir

**Contents**

**1. Raman analysis**

**Table S1.** The weight of cigarette filter samples.

**Table S2.** Number of microfibers (items/100 mL) released from cigarette filters into water at different exposure times.

**Table S3.** Level of microfibers (items/g CFs) released from cigarette filters into water at different exposure times.

**Table S4.** Size and color distribution of microfibers released from cigarette filters into water at different exposure times.

**1. Raman analysis**

In addition to the optical method, DXR3 Raman Microscope (Thermo Fisher) analysis was applied to recognize the polymer type of the extracted MFs. The source of excitation was a laser irradiated at 785 nm. The laser power was 10 mW, with 10 scans per measurement to ensure sufficient signal strength. A spectral resolution of 8 cm⁻¹ was chosen to capture the relevant Raman bands for MFs identification. All MF samples were placed onto prepared copper tapes for analysis. Each copper tape held four individually collected and isolated fragments. The raw spectral data from each sample were exported as plain text (.txt) files using OMNIC software. These files were then imported into MATLAB for data preprocessing and analysis. The spectra were truncated to 400-2450 cm⁻¹ to reduce the data to the characteristic fingerprint, including the most relevant peaks for typical environmental MFs.

A baseline correction was applied to each spectrum using the airPLS algorithm to remove fluorescence and background signals. The parameters for airPLS were optimized by maximizing the signal-to-noise ratio using a genetic algorithm (GA) optimization approach. All spectra were normalized post-baseline correction using z-scores to facilitate comparison across samples. The types of MP fibers were identified by comparing the processed spectra to a reference database containing common MPs observed in environmental samples (Miller et al., 2022). The matching algorithm used a Cauchy-Schwarz distance metric to assess the similarity between the measured and reference spectra (normalized as z-scores). The three best hits were identified, and a threshold value of 0.4 was applied to ensure robust matches. If the hit quality index (HQI) value (r²) exceeded 0.7, the corresponding database entry was considered an identification for the MFs. This rigorous analysis pipeline ensured the precise identification of MF types in all samples and minimized the risk of false positives due to noise or background interference.

**Reference**

Miller, E.A., Yamahara, K.M., French, C., Spingarn, N., Birch, J.M., Van Houtan, K.S., 2022. A Raman spectral reference library of potential anthropogenic and biological ocean polymers. Scientific Data 9, 780.

Table S1. The weight of cigarette filter (in gram) samples.

| **Time**  **Sample** | **1 day** | **2 day** | **7 day** | **15 day** | **30 day** | **60 day** |  |
| --- | --- | --- | --- | --- | --- | --- | --- |
| Brand 1-DW1-LE2-1 | 0.175 | 0.168 | 0.166 | 0.173 | 0.174 | 0.17 |  |
| Brand 1-DW-LE-2 | 0.172 | 0.176 | 0.174 | 0.175 | 0.169 | 0.172 |  |
| Brand 1-DW-LE-3 | 0.172 | 0.172 | 0.168 | 0.177 | 0.169 | 0.175 |  |
| **Mean (± SD)** | **0.173 (±0.002)** | **0.172 (±0.003)** | **0.169 (±0.0031)** | **0.175 (±0.002)** | **0.171 (±0.002)** | **0.172 (±0.002)** |  |
| Brand 1-DW-OE3-1 | 0.176 | 0.17 | 0.172 | 0.183 | 0.176 | 0.176 |  |
| Brand 1-DW-OE-2 | 0.171 | 0.175 | 0.174 | 0.168 | 0.173 | 0.171 |  |
| Brand 1-DW-OE-3 | 0.171 | 0.175 | 0.173 | 0.177 | 0.172 | 0.173 |  |
| **Mean (± SD)** | **0.173 (±0.002)** | **0.173 (±0.003)** | **0.173 (±0.0007)** | **0.176 (±0.006)** | **0.174 (±0.002)** | **0.173 (±0.002)** |  |
| Brand 1-SW4-LE-1 | 0.174 | 0.175 | 0.176 | 0.176 | 0.174 | 0.173 |  |
| Brand 1-SW-LE-2 | 0.173 | 0.175 | 0.169 | 0.171 | 0.171 | 0.177 |  |
| Brand 1-SW-LE-3 | 0.173 | 0.172 | 0.173 | 0.177 | 0.177 | 0.178 |  |
| **Mean (± SD)** | **0.173 (±0.0006)** | **0.174 (±0.002)** | **0.172 (±0.003)** | **0.175 (±0.003)** | **0.174 (±0.003)** | **0.176 (±0.002)** |  |
| Brand 1-SW-OE-1 | 0.17 | 0.177 | 0.171 | 0.173 | 0.168 | 0.179 |  |
| Brand 1-SW-OE-2 | 0.175 | 0.171 | 0.169 | 0.174 | 0.174 | 0.168 |  |
| Brand 1-SW-OE-3 | 0.166 | 0.169 | 0.169 | 0.173 | 0.172 | 0.172 |  |
| **Mean (± SD)** | **0.17 (±0.004)** | **0.172 (±0.003)** | **0.17 (±0.0009)** | **0.173 (±0.0005)** | **0.171 (±0.002)** | **0.173 (±0.005)** |  |
| **Total Mean (± SD)** |  |  |  |  |  |  | **0.173 (± 0.002)** |
| Brand 2-DW-LE-1 | 0.175 | 0.162 | 0.167 | 0.175 | 0.169 | 0.166 |  |
| Brand 2-DW-LE-2 | 0.167 | 0.174 | 0.171 | 0.174 | 0.169 | 0.165 |  |
| Brand 2-DW-LE-3 | 0.172 | 0.171 | 0.169 | 0.169 | 0.171 | 0.163 |  |
| **Mean (± SD)** | **0.171 (±0.003)** | **0.169 (±0.005)** | **0.169 (±0.002)** | **0.173 (±0.003)** | **0.17 (±0.0008)** | **0.165 (±0.001)** |  |
| Brand 2-DW-OE-1 | 0.181 | 0.173 | 0.162 | 0.178 | 0.172 | 0.161 |  |
| Brand 2-DW-OE-2 | 0.175 | 0.166 | 0.165 | 0.174 | 0.168 | 0.17 |  |
| Brand 2-DW-OE-3 | 0.168 | 0.165 | 0.173 | 0.172 | 0.166 | 0.171 |  |
| **Mean (± SD)** | **0.175 (±0.005)** | **0.168 (±0.004)** | **0.167 (±0.005)** | **0.175 (±0.002)** | **0.169 (±0.002)** | **0.167 (±0.004)** |  |
| Brand 2-SW-LE-1 | 0.172 | 0.173 | 0.166 | 0.174 | 0.166 | 0.172 |  |
| Brand 2-SW-LE-2 | 0.173 | 0.179 | 0.168 | 0.174 | 0.170 | 0.169 |  |
| Brand 2-SW-LE-3 | 0.172 | 0.175 | 0.162 | 0.178 | 0.173 | 0.166 |  |
| **Mean (± SD)** | **0.172 (±0.0004)** | **0.176 (±0.002)** | **0.166 (±0.003)** | **0.175 (±0.002)** | **0.17 (±0.003)** | **0.169 (±0.003)** |  |
| Brand 2-SW-OE-1 | 0.171 | 0.17 | 0.167 | 0.175 | 0.166 | 0.169 |  |
| Brand 2-SW-OE-2 | 0.178 | 0.172 | 0.171 | 0.175 | 0.172 | 0.174 |  |
| Brand 2-SW-OE-3 | 0.174 | 0.168 | 0.166 | 0.163 | 0.168 | 0.168 |  |
| **Mean (± SD)** | **0.174 (±0.003)** | **0.17 (±0.005)** | **0.168 (±0.002)** | **0.171 (±0.003)** | **0.169 (±0.0008)** | **0.17 (±0.001)** |  |
| **Total Mean (± SD)** |  |  |  |  |  |  | **0.172 (± 0.003)** |
| 1: DW: distillated water; 2: LE: lab environment; 3: OE: outdoor environment; 4: SW: seawater. | | | | | | | |

Table S2. Number of microfibers (items/100 mL) released from cigarette filters into water at different exposure times.

| **Time**  **Sample** | **1 day** | **2 day** | **7 day** | **15 day** | **30 day** | **60 day** |
| --- | --- | --- | --- | --- | --- | --- |
| Brand 1-DW1-LE2-1 | 0 | 1 | 1 | 2 | 3 | 2 |
| Brand 1-DW-LE-2 | 1 | 0 | 0 | 3 | 1 | 2 |
| Brand 1-DW-LE-3 | 0 | 1 | 2 | 0 | 1 | 3 |
| **Sum** | **1** | **2** | **3** | **5** | **5** | **7** |
| Brand 1-DW-OE3-1 | 0 | 0 | 2 | 2 | 3 | 3 |
| Brand 1-DW-OE-2 | 1 | 1 | 1 | 1 | 1 | 1 |
| Brand 1-DW-OE-3 | 0 | 2 | 1 | 3 | 2 | 5 |
| **Sum** | **1** | **3** | **4** | **6** | **6** | **9** |
| Brand 1-SW4-LE-1 | 1 | 2 | 3 | 3 | 5 | 3 |
| Brand 1-SW-LE-2 | 2 | 3 | 2 | 4 | 1 | 5 |
| Brand 1-SW-LE-3 | 3 | 1 | 2 | 2 | 4 | 4 |
| **Sum** | **6** | **6** | **7** | **9** | **10** | **12** |
| Brand 1-SW-OE-1 | 1 | 1 | 2 | 3 | 4 | 7 |
| Brand 1-SW-OE-2 | 1 | 3 | 4 | 5 | 5 | 4 |
| Brand 1-SW-OE-3 | 2 | 2 | 2 | 3 | 4 | 5 |
| **Sum** | **4** | **6** | **8** | **11** | **13** | **16** |
| Brand 2-DW-LE-1 | 1 | 1 | 1 | 1 | 1 | 3 |
| Brand 2-DW-LE-2 | 0 | 0 | 1 | 2 | 2 | 1 |
| Brand 2-DW-LE-3 | 0 | 1 | 0 | 0 | 0 | 1 |
| **Sum** | **1** | **2** | **2** | **3** | **3** | **5** |
| Brand 2-DW-OE-1 | 0 | 1 | 0 | 1 | 1 | 2 |
| Brand 2-DW-OE-2 | 1 | 0 | 2 | 1 | 1 | 3 |
| Brand 2-DW-OE-3 | 0 | 2 | 2 | 2 | 4 | 3 |
| **Sum** | **1** | **3** | **4** | **4** | **6** | **8** |
| Brand 2-SW-LE-1 | 1 | 2 | 2 | 2 | 4 | 5 |
| Brand 2-SW-LE-2 | 2 | 3 | 3 | 4 | 2 | 2 |
| Brand 2-SW-LE-3 | 1 | 1 | 2 | 2 | 3 | 4 |
| **Sum** | **4** | **6** | **7** | **8** | **9** | **11** |
| Brand 2-SW-OE-1 | 1 | 1 | 2 | 2 | 4 | 6 |
| Brand 2-SW-OE-2 | 2 | 1 | 2 | 4 | 3 | 4 |
| Brand 2-SW-OE-3 | 0 | 2 | 1 | 2 | 3 | 5 |
| **Sum** | **3** | **4** | **5** | **8** | **10** | **15** |
| 1: DW: distillated water; 2: LE: lab environment; 3: OE: outdoor environment; 4: SW: seawater. | | | | | | |

Table S3. Level of microfibers (items/g CFs) released from cigarette filters into water at different exposure times.

| **Time**  **Sample** | **1 day** | **2 day** | **7 day** | **15 day** | **30 day** | **60 day** |  |
| --- | --- | --- | --- | --- | --- | --- | --- |
| Brand 1-DW1-LE2-1 | 0 | 5.73 | 6.01 | 11.59 | 17.25 | 11.77 |  |
| Brand 1-DW-LE-2 | 5.8 | 0 | 0 | 17.15 | 5.92 | 11.62 |  |
| Brand 1-DW-LE-3 | 0 | 5.82 | 11.88 | 0 | 5.91 | 17.15 |  |
| **Mean (± SD)** | **1.93 (±1.33)** | **3.850(±2.72)** | **5.97 (±4.85)** | **9.58 (±7.15)** | **9.69 (±5.34)** | **13.52 (±2.57)** |  |
| Brand 1-DW-OE3-1 | 0 | 0 | 11.60 | 10.95 | 17.04 | 17.08 |  |
| Brand 1-DW-OE-2 | 5.72 | 5.71 | 5.75 | 5.97 | 5.78 | 5.84 |  |
| Brand 1-DW-OE-3 | 0 | 11.4 | 5.797 | 16.959 | 11.621 | 28.835 |  |
| **Mean (± SD)** | **1.91(±1.3)** | **5.71 (±4.66)** | **7.72 (±2.75)** | **11.29 (±4.49)** | **11.48 (±4.6)** | **17.25 (±9.39)** |  |
| Brand 1-SW4-LE-1 | 5.7 | 11.91 | 17.06 | 17.01 | 28.77 | 17.34 |  |
| Brand 1-SW-LE-2 | 11.64 | 17.08 | 11.86 | 23.43 | 5.86 | 28.3 |  |
| Brand 1-SW-LE-3 | 17.46 | 5.81 | 11.59 | 11.33 | 22.59 | 22.52 |  |
| **Mean (± SD)** | **11.6 (±4.8)** | **11.6(±4.61)** | **13.5 (±2.52)** | **17.26 (±4.95)** | **19.07 (±9.68)** | **22.72 (±4.48)** |  |
| Brand 1-SW-OE-1 | 5.68 | 5.67 | 11.7 | 17.33 | 23.77 | 39.04 |  |
| Brand 1-SW-OE-2 | 5.86 | 17.56 | 23.68 | 28.7 | 28.77 | 23.84 |  |
| Brand 1-SW-OE-3 | 11.7 | 11.86 | 11.83 | 17.33 | 23.28 | 29.04 |  |
| **Mean (± SD)** | **7.75 (±2.8)** | **11.7 (±4.86)** | **15.74 (±5.62)** | **21.12 (±5.36)** | **25.27 (±2.48)** | **30.64 (±6.31)** |  |
| Brand 2-DW-LE-1 | 5.8 | 6.17 | 5.99 | 5.7 | 5.9 | 18.04 |  |
| Brand 2-DW-LE-2 | 0 | 0 | 5.86 | 11.52 | 11.81 | 6.06 |  |
| Brand 2-DW-LE-3 | 0 | 5.85 | 0 | 0 | 0 | 6.12 |  |
| **Mean (± SD)** | **1.93 (±1.43)** | **4.01 (±2.84)** | **3.95 (±2.79)** | **5.74 (±4.7)** | **5.91 (±4.82)** | **10.07 (±5.63)** |  |
| Brand 2-DW-OE-1 | 0 | 5.77 | 0 | 5.63 | 5.81 | 12.42 |  |
| Brand 2-DW-OE-2 | 5.62 | 0 | 12.14 | 5.74 | 5.94 | 17.64 |  |
| Brand 2-DW-OE-3 | 0 | 12.1 | 11.53 | 11.64 | 24.07 | 17.53 |  |
| **Mean (± SD)** | **1.87 (±1.55)** | **5.96 (±4.94)** | **7.89 (±5.58)** | **7.67 (±2.81)** | **11.94 (±8.58)** | **15.86 (±2.44)** |  |
| Brand 2-SW-LE-1 | 5.72 | 12.33 | 12.03 | 11.47 | 24.04 | 29.02 |  |
| Brand 2-SW-LE-2 | 11.95 | 17.24 | 17.84 | 23.03 | 11.74 | 11.82 |  |
| Brand 2-SW-LE-3 | 5.81 | 5.85 | 12.33 | 11.26 | 17.35 | 24.17 |  |
| **Mean (± SD)** | **7.83 (±2.91)** | **11.81 (±4.67)** | **14.06 (±2.67)** | **15.25 (±5.5)** | **17.71 (±5.03)** | **21.67 (±7.24)** |  |
| Brand 2-SW-OE-1 | 5.51 | 5.89 | 11.96 | 11.44 | 24.08 | 35.61 |  |
| Brand 2-SW-OE-2 | 11.46 | 5.81 | 11.7 | 22.92 | 17.41 | 23.06 |  |
| Brand 2-SW-OE-3 | 0 | 11.94 | 6.01 | 12.25 | 17.84 | 29.74 |  |
| **Mean (± SD)** | **5.66 (±4.68)** | **7.88 (±2.87)** | **9.89 (±2.74)** | **15.54 (±5.23)** | **19.78 (±3.05)** | **29.47 (±5.13)** |  |
| **Total Mean (± SD)** | **16.64 (±9.37)** | **23.31 (±9.73)** | **29.53 (±11.76)** | **38.8 (±14.64)** | **45.34 (±18)** | **60.63 (±20.78)** |  |
| **p-value a** |  |  |  |  |  |  | 0.000* |
| **p-value b** |  |  |  |  |  |  | 0.601 |
| **p-value c** |  |  |  |  |  |  | 0.001* |
| **p-value d** |  |  |  |  |  |  | 0.591 |
| 1: DW: distillated water; 2: LE: lab environment; 3: OE: outdoor environment; 4: SW: seawater.  a Difference between different exposure time.  b Differences between different brands of cigarette.  c Differences between different water.  d Differences between two environmental condition.  *Significant at p-value< 0.05. | | | | | | | |

Table S4. Size and color distribution of microfibers released from cigarette filters into water at different exposure times.

| **Characteristics** | **Category** | **1 day** | | | | | | | | **2 day** | | | | | | | | **7 day** | | | | | | | | **15 day** | | | | | | | | **30 day** | | | | | | | | **60 day** | | | | | | | | **Total** |
| --- | --- | --- | --- | --- | --- | --- | --- | --- | --- | --- | --- | --- | --- | --- | --- | --- | --- | --- | --- | --- | --- | --- | --- | --- | --- | --- | --- | --- | --- | --- | --- | --- | --- | --- | --- | --- | --- | --- | --- | --- | --- | --- | --- | --- | --- | --- | --- | --- | --- | --- |
|  |  | **Brand 1** | | | | **Brand 2** | | | | **Brand 1** | | | | **Brand 2** | | | | **Brand 1** | | | | **Brand 2** | | | | **Brand 1** | | | | **Brand 2** | | | | **Brand 1** | | | | **Brand 2** | | | | **Brand 1** | | | | **Brand 2** | | | |  |
|  |  | **DW1-LE2** | **DW-OE3** | **SW4-LE** | **SW-OE** | **DW-LE** | **DW-OE** | **SW-LE** | **SW-OE** | **DW-LE** | **DW-OE** | **SW-LE** | **SW-OE** | **DW-LE** | **DW-OE** | **SW-LE** | **SW-OE** | **DW-LE** | **DW-OE** | **SW-LE** | **SW-OE** | **DW-LE** | **DW-OE** | **SW-LE** | **SW-OE** | **DW-LE** | **DW-OE** | **SW-LE** | **SW-OE** | **DW-LE** | **DW-OE** | **SW-LE** | **SW-OE** | **DW-LE** | **DW-OE** | **SW-LE** | **SW-OE** | **DW-LE** | **DW-OE** | **SW-LE** | **SW-OE** | **DW-LE** | **DW-OE** | **SW-LE** | **SW-OE** | **DW-LE** | **DW-OE** | **SW-LE** | **SW-OE** |  |
| **Size** | **20-50 µm** | 0 | 0 | 0 | 0 | 0 | 0 | 0 | 0 | 0 | 0 | 2 | 0 | 0 | 0 | 0 | 0 | 0 | 1 | 0 | 1 | 0 | 0 | 0 | 1 | 1 | 2 | 5 | 4 | 0 | 2 | 2 | 3 | 2 | 0 | 3 | 7 | 1 | 3 | 5 | 5 | 1 | 4 | 4 | 6 | 2 | 3 | 5 | 7 | **82** |
| **50-100 µm** | 0 | 0 | 0 | 0 | 0 | 0 | 0 | 0 | 0 | 0 | 0 | 0 | 0 | 1 | 0 | 0 | 0 | 0 | 1 | 3 | 0 | 0 | 0 | 0 | 2 | 3 | 3 | 4 | 1 | 1 | 2 | 1 | 2 | 3 | 5 | 4 | 1 | 2 | 3 | 1 | 2 | 2 | 3 | 3 | 1 | 2 | 3 | 3 | **62** |
| **100-250 µm** | 0 | 0 | 1 | 4 | 0 | 0 | 2 | 1 | 1 | 1 | 2 | 2 | 1 | 2 | 4 | 0 | 2 | 1 | 4 | 2 | 1 | 2 | 4 | 2 | 1 | 1 | 1 | 1 | 1 | 1 | 2 | 0 | 1 | 3 | 2 | 1 | 0 | 1 | 1 | 3 | 1 | 2 | 1 | 2 | 1 | 2 | 2 | 3 | **73** |
| **250-500 µm** | 1 | 1 | 3 | 0 | 1 | 1 | 2 | 0 | 0 | 1 | 2 | 1 | 1 | 0 | 1 | 3 | 1 | 1 | 0 | 1 | 0 | 2 | 2 | 1 | 1 | 0 | 0 | 1 | 0 | 0 | 1 | 3 | 0 | 0 | 0 | 1 | 1 | 0 | 0 | 0 | 2 | 0 | 2 | 2 | 1 | 1 | 0 | 2 | **44** |
| **500-1000 µm** | 0 | 0 | 0 | 0 | 0 | 0 | 0 | 2 | 1 | 1 | 0 | 0 | 0 | 0 | 1 | 1 | 0 | 1 | 0 | 1 | 1 | 0 | 0 | 1 | 0 | 0 | 0 | 1 | 1 | 0 | 0 | 1 | 0 | 0 | 0 | 0 | 0 | 0 | 0 | 1 | 1 | 1 | 2 | 1 | 0 | 0 | 1 | 1 | **21** |
| **1000-5000 µm** | 0 | 0 | 2 | 0 | 0 | 1 | 0 | 0 | 0 | 0 | 0 | 3 | 0 | 0 | 0 | 0 | 0 | 0 | 2 | 0 | 0 | 0 | 1 | 0 | 0 | 0 | 0 | 0 | 0 | 0 | 1 | 0 | 0 | 0 | 0 | 0 | 0 | 0 | 0 | 0 | 0 | 0 | 0 | 1 | 0 | 0 | 0 | 0 | **12** |
| **Color** | **White/Transparent** | 1 | 1 | 3 | 3 | 1 | 2 | 3 | 3 | 1 | 2 | 5 | 4 | 2 | 1 | 4 | 3 | 2 | 3 | 4 | 6 | 2 | 3 | 5 | 4 | 2 | 5 | 6 | 7 | 3 | 3 | 6 | 5 | 4 | 4 | 5 | 10 | 3 | 5 | 8 | 7 | 5 | 6 | 8 | 11 | 3 | 7 | 6 | 12 | **209** |
| **Black/Gray** | 0 | 0 | 1 | 0 | 0 | 0 | 1 | 0 | 0 | 1 | 1 | 0 | 0 | 0 | 1 | 1 | 1 | 1 | 2 | 2 | 0 | 1 | 2 | 1 | 2 | 0 | 2 | 3 | 0 | 1 | 1 | 2 | 1 | 2 | 3 | 3 | 0 | 1 | 0 | 3 | 2 | 2 | 4 | 5 | 2 | 1 | 3 | 3 | **62** |
| **Red/Brown** | 0 | 0 | 1 | 0 | 0 | 0 | 0 | 0 | 1 | 0 | 0 | 1 | 0 | 1 | 1 | 0 | 0 | 0 | 0 | 0 | 0 | 0 | 0 | 0 | 0 | 1 | 1 | 1 | 0 | 0 | 1 | 1 | 0 | 0 | 2 | 0 | 0 | 0 | 1 | 0 | 0 | 0 | 0 | 0 | 0 | 0 | 2 | 0 | **15** |
| **Blue/Green** | 0 | 0 | 1 | 1 | 0 | 0 | 0 | 0 | 0 | 0 | 0 | 1 | 0 | 1 | 0 | 0 | 0 | 0 | 1 | 0 | 0 | 0 | 0 | 0 | 1 | 0 | 0 | 0 | 0 | 0 | 0 | 0 | 0 | 0 | 0 | 0 | 0 | 0 | 0 | 0 | 0 | 1 | 0 | 0 | 0 | 0 | 0 | 0 | **7** |
| **Total** |  | **22** | | | | | | | | **32** | | | | | | | | **40** | | | | | | | | **54** | | | | | | | | **62** | | | | | | | | **83** | | | | | | | | **293** |
| 1: DW: distillated water; 2: LE: lab environment; 3: OE: outdoor environment; 4: SW: seawater. | | | | | | | | | | | | | | | | | | | | | | | | | | | | | | | | | | | | | | | | | | | | | | | | | | |
